# Supplementary material for: Body Fat Reduction Effect of Bifidobacterium breve B-3: A Randomized, Double-Blind, Placebo Comparative Clinical Trial
Source: MDPI journal article supplement (doi:10.3390/nu15010028), 2022-12-21
Supplement: s1 [file s1]

**Table S1. Raw materials and mixing ratio of the study intervention**

|         | Raw material                       | Mixing ratio (%) | Content (mg) |
|---------|------------------------------------|------------------|--------------|
| BB-3    | <i>Bifidobacterium breve</i> B-3 * | 11.11            | 50.00        |
|         | Maltodextrin                       | 85.89            | 386.50       |
|         | Magnesium stearate                 | 1.00             | 4.50         |
|         | Silicon dioxide                    | 2.00             | 9.00         |
|         | Total                              | 100.00           | 450.00       |
| Placebo | Maltodextrin                       | 97.00            | 436.50       |
|         | Magnesium stearate                 | 1.00             | 4.50         |
|         | Silicon dioxide                    | 2.00             | 9.00         |
|         | Total                              | 100.00           | 450.00       |

\**Bifidobacterium breve* B-3 contains  $1 \times 10^{11}$  CFU of *Bifidobacterium breve* B-3 per 1 g of corn starch including *Bifidobacterium breve* B-3 as the same raw material as the B-3-EX product sold commercially by Morinaga Dairy in Japan. Every 50 mg of *Bifidobacterium breve* contains  $5 \times 10^9$  CFU of *Bifidobacterium breve* B-3.

**Table S2. Changes in body weight and body mass index (PPS)**

|                                                     |                          | BB-3 group (N=42)    | Placebo group (N=41) |
|-----------------------------------------------------|--------------------------|----------------------|----------------------|
| Body weight<br>(kg), mean±SD                        | V2                       | 72.71±8.22           | 70.82±8.17           |
|                                                     | V5                       | 71.48±7.80           | 70.67±8.25           |
|                                                     | V5-V2                    | -1.23±1.83           | -0.15±1.49           |
|                                                     | <i>p</i> -value          | <0.0001 <sup>2</sup> | 0.5332 <sup>1</sup>  |
|                                                     | Difference V5-V2 (Tx-Px) |                      | -1.08±1.67           |
|                                                     | <i>p</i> -value          |                      | 0.0060 <sup>3</sup>  |
| Body mass index<br>(kg/m <sup>2</sup> ),<br>mean±SD | V2                       | 26.93±1.29           | 26.85±1.38           |
|                                                     | V5                       | 26.49±1.34           | 26.79±1.51           |
|                                                     | V5-V2                    | -0.43±0.64           | -0.06±0.57           |
|                                                     | <i>p</i> -value          | 0.0001 <sup>1</sup>  | 0.5344 <sup>1</sup>  |
|                                                     | Difference V5-V2 (Tx-Px) |                      | -0.38±0.61           |
|                                                     | LS mean difference       |                      | -0.37                |
|                                                     | <i>p</i> -value          |                      | 0.0074 <sup>4</sup>  |

<sup>1</sup> *p*-value for the paired t-test (T)

<sup>2</sup> *p*-value for the Wilcoxon signed rank test (W)

<sup>3</sup> *p*-value for the Wilcoxon rank sum test

<sup>4</sup> *p*-value for ANCOVA adjusted for baseline values and sex

**Table S3. Changes in waist circumference, hip circumference, and waist-hip-ratio (PPS)**

|                                      |                          | BB-3 group (N=42)   | Placebo group (N=41) |
|--------------------------------------|--------------------------|---------------------|----------------------|
| Waist circumference<br>(cm), mean±SD | V2                       | 88.39±4.58          | 87.62±5.55           |
|                                      | V5                       | 86.39±4.15          | 87.86±5.50           |
|                                      | V5-V2                    | -2.01±3.12          | 0.23±3.95            |
|                                      | <i>p</i> -value          | 0.0002 <sup>1</sup> | 0.7423 <sup>2</sup>  |
|                                      | Difference V5-V2 (Tx-Px) |                     | -2.24±3.55           |
|                                      | <i>p</i> -value          |                     | 0.0042 <sup>3</sup>  |
| Hip circumference<br>(cm), mean±SD   | V2                       | 99.04±3.66          | 98.60±3.89           |
|                                      | V5                       | 97.96±3.35          | 98.58±3.56           |
|                                      | V5-V2                    | -1.08±2.50          | -0.02±2.20           |
|                                      | <i>p</i> -value          | 0.0011 <sup>2</sup> | 0.9493 <sup>1</sup>  |
|                                      | Difference V5-V2 (Tx-Px) |                     | -1.06±2.35           |
|                                      | <i>p</i> -value          |                     | 0.0161 <sup>3</sup>  |
| Waist:hip ratio,<br>mean±SD          | V2                       | 0.89±0.04           | 0.89±0.05            |
|                                      | V5                       | 0.88±0.04           | 0.89±0.05            |
|                                      | V5-V2                    | -0.01±0.03          | 0.00±0.04            |
|                                      | <i>p</i> -value          | 0.0468 <sup>2</sup> | 0.6571 <sup>1</sup>  |
|                                      | Difference V5-V2 (Tx-Px) |                     | -0.01±0.03           |
|                                      | <i>p</i> -value          |                     | 0.1861 <sup>3</sup>  |

<sup>1</sup> *p*-value for the paired t-test (T)<sup>2</sup> *p*-value for the Wilcoxon signed rank test (W)<sup>3</sup> *p*-value for the Wilcoxon rank sum test

**Table S4. DEXA results by anatomical region at 12 weeks from baseline (PPS)**

|                            |                          |                          | BB-3 group (N=42)   | Placebo group (N=41) |
|----------------------------|--------------------------|--------------------------|---------------------|----------------------|
| Body fat mass (g), mean±SD | Arm                      | V2                       | 2717.45±451.18      | 2851.51±570.51       |
|                            |                          | V5                       | 2684.07±525.71      | 2854.12±532.35       |
|                            |                          | V5-V2                    | -33.38±303.75       | 2.61±212.80          |
|                            |                          | <i>p</i> -value          | 0.3292 <sup>2</sup> | 0.9378 <sup>1</sup>  |
|                            | Difference V5-V2 (Tx-Px) |                          | -35.99±262.80       |                      |
|                            | <i>p</i> -value          |                          | 0.4046 <sup>4</sup> |                      |
|                            | Legs                     | V2                       | 7171.36±1802.64     | 7672.22±1758.44      |
|                            |                          | V5                       | 7004.48±1765.71     | 7588.22±1831.60      |
|                            |                          | V5-V2                    | -166.88±403.76      | -84.00±339.32        |
|                            |                          | <i>p</i> -value          | 0.0106 <sup>1</sup> | 0.1208 <sup>1</sup>  |
|                            |                          | Difference V5-V2 (Tx-Px) |                     | -82.88±373.33        |
|                            |                          | LS mean difference       |                     | -90.29               |
|                            | <i>p</i> -value          |                          | 0.2834 <sup>3</sup> |                      |
| Trunk                      | Trunk                    | V2                       | 14606.17±2651.25    | 14693.63±2329.44     |
|                            |                          | V5                       | 14224.12±2643.83    | 14710.20±2390.93     |
|                            |                          | V5-V2                    | -382.05±738.20      | 16.56±700.23         |
|                            |                          | <i>p</i> -value          | 0.0017 <sup>1</sup> | 0.8804 <sup>1</sup>  |
|                            | Difference V5-V2 (Tx-Px) |                          | -398.61±719.70      |                      |
|                            | LS mean difference       |                          | -399.78             |                      |
|                            | <i>p</i> -value          |                          | 0.0144 <sup>3</sup> |                      |
| Android                    | Android                  | V2                       | 2353.33±501.31      | 2381.15±488.41       |
|                            |                          | V5                       | 2268.76±467.66      | 2392.17±486.80       |
|                            |                          | V5-V2                    | -84.57±184.00       | 11.02±148.78         |
|                            |                          | <i>p</i> -value          | 0.0048 <sup>1</sup> | 0.6378 <sup>1</sup>  |
|                            | Difference V5-V2 (Tx-Px) |                          | -95.60±167.54       |                      |

|                                  |                          |     |                     |                     |
|----------------------------------|--------------------------|-----|---------------------|---------------------|
|                                  |                          |     | LS mean difference  | -93.27              |
|                                  |                          |     | <i>p</i> -value     | 0.0104 <sup>3</sup> |
| Gynoid                           | V2                       |     | 3884.48±977.53      | 4112.54±979.29      |
|                                  | V5                       |     | 3818.45±1008.41     | 4150.12±929.63      |
|                                  | V5-V2                    |     | -66.02±149.31       | 37.59±526.11        |
|                                  | <i>p</i> -value          |     | 0.0065 <sup>1</sup> | 0.5925 <sup>2</sup> |
|                                  | Difference V5-V2 (Tx-Px) |     | -103.61±384.67      |                     |
|                                  |                          |     | <i>p</i> -value     | 0.4202 <sup>4</sup> |
| Body fat percentage (%), mean±SD | V2                       | Arm | 36.37±8.45          | 39.40±8.51          |
|                                  | V5                       |     | 36.16±8.88          | 39.29±8.22          |
|                                  | V5-V2                    |     | -0.21±2.02          | -0.11±1.71          |
|                                  | <i>p</i> -value          |     | 0.5095 <sup>1</sup> | 0.9400 <sup>2</sup> |
|                                  | Difference V5-V2 (Tx-Px) |     | -0.10±1.87          |                     |
|                                  |                          |     | <i>p</i> -value     | 0.5060 <sup>4</sup> |
| Legs                             | V2                       |     | 33.05±7.71          | 35.80±7.53          |
|                                  | V5                       |     | 32.85±7.70          | 35.53±7.65          |
|                                  | V52-V2                   |     | -0.20±1.20          | -0.27±1.15          |
|                                  | <i>p</i> -value          |     | 0.2916 <sup>1</sup> | 0.1410 <sup>1</sup> |
|                                  | Difference V5-V2 (Tx-Px) |     | 0.07±1.18           |                     |
|                                  |                          |     | LS mean difference  | 0.07                |
|                                  |                          |     | <i>p</i> -value     | 0.7886 <sup>3</sup> |
| Trunk                            | V2                       |     | 40.39±6.76          | 42.19±6.06          |
|                                  | V5                       |     | 39.94±6.87          | 42.20±6.16          |
|                                  | V5-V2                    |     | -0.45±1.81          | 0.01±1.40           |
|                                  | <i>p</i> -value          |     | 0.1167 <sup>1</sup> | 0.9647 <sup>1</sup> |
|                                  | Difference V5-V2 (Tx-Px) |     | -0.46±1.62          |                     |
|                                  |                          |     | LS mean difference  | -0.49               |

|                            |                          |                     |                     |                     |
|----------------------------|--------------------------|---------------------|---------------------|---------------------|
|                            |                          | <i>p</i> -value     | 0.1765 <sup>3</sup> |                     |
| Android                    | V2                       | 42.67±7.63          | 44.54±6.58          |                     |
|                            | V5                       | 42.42±7.61          | 44.77±6.74          |                     |
|                            | V5-V2                    | -0.26±2.19          | 0.23±1.75           |                     |
|                            | <i>p</i> -value          | 0.4517 <sup>1</sup> | 0.4121 <sup>1</sup> |                     |
|                            | Difference V5-V2 (Tx-Px) |                     | -0.48±1.99          |                     |
|                            | LS mean difference       |                     | -0.52               |                     |
|                            | <i>p</i> -value          |                     | 0.2279 <sup>3</sup> |                     |
| Gynoid                     | V2                       | 35.81±8.63          | 39.07±8.38          |                     |
|                            | V5                       | 35.72±8.86          | 38.90±8.34          |                     |
|                            | V5-V2                    | -0.09±1.35          | -0.16±1.50          |                     |
|                            | <i>p</i> -value          | 0.6752 <sup>1</sup> | 0.4891 <sup>1</sup> |                     |
|                            | Difference V5-V2 (Tx-Px) |                     | 0.08±1.43           |                     |
|                            | LS mean difference       |                     | 0.07                |                     |
|                            | <i>p</i> -value          |                     | 0.8401 <sup>3</sup> |                     |
| Fat-free mass (g), mean±SD | Arm                      | V2                  | 5259.83±1434.55     | 4825.59±1447.03     |
|                            |                          | V5                  | 5221.40±1398.37     | 4864.32±1466.10     |
|                            |                          | V5-V2               | -38.43±321.71       | 38.73±265.01        |
|                            |                          | <i>p</i> -value     | 0.7728 <sup>2</sup> | 0.4868 <sup>2</sup> |
|                            | Difference V5-V2 (Tx-Px) |                     | -77.16±295.07       |                     |
|                            | <i>p</i> -value          |                     | 0.4415 <sup>4</sup> |                     |
|                            | Legs                     | V2                  | 15562.10±3223.26    | 14749.71±3172.57    |
|                            |                          | V5                  | 15316.62±3075.54    | 14747.10±3177.69    |
|                            |                          | V5-V2               | -245.48±629.62      | -2.61±508.51        |
|                            |                          | <i>p</i> -value     | 0.0155 <sup>1</sup> | 0.9739 <sup>1</sup> |
| Difference V5-V2 (Tx-Px)   |                          | -242.87±573.02      |                     |                     |
| LS mean difference         |                          | -204.55             |                     |                     |
| <i>p</i> -value            |                          | 0.1023 <sup>3</sup> |                     |                     |

|         |                          |                     |                     |
|---------|--------------------------|---------------------|---------------------|
| Trunk   | V2                       | 22465.10±3967.22    | 21025.29±3809.72    |
|         | V5                       | 22276.95±4001.92    | 21006.56±3684.69    |
|         | V5-V2                    | -188.14±1230.11     | -18.73±738.79       |
|         | <i>p</i> -value          | 0.6141 <sup>2</sup> | 0.8718 <sup>1</sup> |
|         | Difference V5-V2 (Tx-Px) | -169.41±1017.57     |                     |
|         | <i>p</i> -value          | 0.7987 <sup>4</sup> |                     |
|         | V2                       | 3233.17±688.73      | 3014.71±580.10      |
|         | V5                       | 3151.40±654.83      | 2999.66±565.22      |
|         | V5-V2                    | -81.76±205.95       | -15.05±137.82       |
|         | <i>p</i> -value          | 0.0138 <sup>1</sup> | 0.5925 <sup>2</sup> |
| Android | Difference V5-V2 (Tx-Px) | -66.71±175.64       |                     |
|         | <i>p</i> -value          | 0.1329 <sup>4</sup> |                     |
|         | V2                       | 7305.05±1578.33     | 6848.68±1493.16     |
|         | V5                       | 7196.81±1545.12     | 6833.27±1474.53     |
|         | V5-V2                    | -108.24±268.91      | -15.41±168.28       |
|         | <i>p</i> -value          | 0.0126 <sup>1</sup> | 0.5608 <sup>1</sup> |
|         | Difference V5-V2 (Tx-Px) | -92.82±224.92       |                     |
|         | LS mean difference       | -71.70              |                     |
|         | <i>p</i> -value          | 0.1419 <sup>3</sup> |                     |
|         |                          |                     |                     |
| Gynoid  | V2                       | 7305.05±1578.33     | 6848.68±1493.16     |
|         | V5                       | 7196.81±1545.12     | 6833.27±1474.53     |
|         | V5-V2                    | -108.24±268.91      | -15.41±168.28       |
|         | <i>p</i> -value          | 0.0126 <sup>1</sup> | 0.5608 <sup>1</sup> |
|         | Difference V5-V2 (Tx-Px) | -92.82±224.92       |                     |
|         | LS mean difference       | -71.70              |                     |
|         | <i>p</i> -value          | 0.1419 <sup>3</sup> |                     |
|         |                          |                     |                     |
|         |                          |                     |                     |
|         |                          |                     |                     |

<sup>1</sup> *p*-value for the paired t-test

<sup>2</sup> *p*-value for the Wilcoxon signed rank test

<sup>3</sup> *p*-value for ANCOVA adjusted for baseline and sex

<sup>4</sup> *p*-value for the Wilcoxon rank sum test

**Table S5. CT results at 12 weeks from baseline (PPS)**

|                                                             |                          | BB-3 group (N=42)   | Placebo group (N=41) |
|-------------------------------------------------------------|--------------------------|---------------------|----------------------|
| Total fat area<br>(cm <sup>2</sup> ), mean±SD               | V2                       | 359.07±60.96        | 378.02±59.20         |
|                                                             | V5                       | 359.73±66.35        | 389.58±74.95         |
|                                                             | V5-V2                    | 0.66±52.06          | 11.56±51.91          |
|                                                             | <i>p</i> -value          | 0.9347 <sup>1</sup> | 0.1616 <sup>1</sup>  |
|                                                             | Difference V5-V2 (Tx-Px) |                     | -10.90±51.98         |
|                                                             | LS mean difference       |                     | -12.78               |
|                                                             | <i>p</i> -value          |                     | 0.2591 <sup>3</sup>  |
| Subcutaneous fat<br>area (cm <sup>2</sup> ),<br>mean±SD     | V2                       | 218.72±52.88        | 242.90±52.65         |
|                                                             | V5                       | 220.98±64.55        | 254.93±65.79         |
|                                                             | V5-V2                    | 2.26±44.79          | 12.03±41.32          |
|                                                             | <i>p</i> -value          | 0.7456 <sup>1</sup> | 0.0697 <sup>1</sup>  |
|                                                             | Difference V5-V2 (Tx-Px) |                     | -9.77±43.11          |
|                                                             | LS mean difference       |                     | -11.76               |
|                                                             | <i>p</i> -value          |                     | 0.2246 <sup>3</sup>  |
| Visceral fat area<br>(cm <sup>2</sup> ), mean±SD            | V2                       | 140.35±47.36        | 132.68±44.92         |
|                                                             | V5                       | 138.75±48.78        | 134.65±43.95         |
|                                                             | V5-V2                    | -1.60±26.72         | 1.97±24.15           |
|                                                             | <i>p</i> -value          | 0.7008 <sup>1</sup> | 0.6039 <sup>1</sup>  |
|                                                             | Difference V5-V2 (Tx-Px) |                     | -3.57±25.48          |
|                                                             | LS mean difference       |                     | -2.29                |
|                                                             | <i>p</i> -value          |                     | 0.6776 <sup>3</sup>  |
| Visceral<br>fat:subcutaneous<br>fat ratio (VSR),<br>mean±SD | V2                       | 0.70±0.34           | 0.58±0.26            |
|                                                             | V5                       | 0.71±0.39           | 0.57±0.26            |
|                                                             | V5-V2                    | 0.01±0.19           | -0.02±0.15           |
|                                                             | <i>p</i> -value          | 0.5564 <sup>2</sup> | 0.0891 <sup>2</sup>  |
|                                                             | Difference V5-V2 (Tx-Px) |                     | 0.02±0.17            |
|                                                             | <i>p</i> -value          |                     | 0.8163 <sup>4</sup>  |

<sup>1</sup> *p*-value for the paired t-test

<sup>2</sup> *p*-value for the Wilcoxon signed rank test

<sup>3</sup> *p*-value for ANCOVA adjusted for baseline and sex

<sup>4</sup> *p*-value for the Wilcoxon rank sum test



**Table S6. Results of blood lipid levels at 12 weeks from baseline (PPS)**

|                                       |                          | BB-3 group (N=42)   | Placebo group (N=41) |
|---------------------------------------|--------------------------|---------------------|----------------------|
| Total cholesterol<br>(mg/dl), mean±SD | V1                       | 198.05±32.62        | 201.41±36.59         |
|                                       | V5                       | 188.81±31.41        | 196.05±35.21         |
|                                       | V5-V1                    | -9.24±23.83         | -5.37±25.93          |
|                                       | <i>p</i> -value          | 0.0160 <sup>1</sup> | 0.1927 <sup>1</sup>  |
|                                       | Difference V5-V1 (Tx-Px) |                     | -3.87±24.89          |
|                                       | LS mean difference       |                     | -4.41                |
|                                       | <i>p</i> -value          |                     | 0.3847 <sup>3</sup>  |
| LDL cholesterol<br>(mg/dl), mean±SD   | V1                       | 119.07±26.33        | 121.51±27.23         |
|                                       | V5                       | 111.50±22.07        | 117.49±25.21         |
|                                       | V5-V1                    | -7.57±16.07         | -4.02±16.89          |
|                                       | <i>p</i> -value          | 0.0040 <sup>1</sup> | 0.1349 <sup>1</sup>  |
|                                       | Difference V5-V1 (Tx-Px) |                     | -3.55±16.48          |
|                                       | LS mean difference       |                     | -4.27                |
|                                       | <i>p</i> -value          |                     | 0.1889 <sup>3</sup>  |
| Triglyceride<br>(mg/dl), mean±SD      | V1                       | 150.83±83.53        | 145.15±80.41         |
|                                       | V5                       | 149.38±73.95        | 135.41±64.38         |
|                                       | V5-V1                    | -1.45±84.08         | -9.73±56.75          |
|                                       | <i>p</i> -value          | 0.9114 <sup>1</sup> | 0.6610 <sup>2</sup>  |
|                                       | Difference V5-V1 (Tx-Px) |                     | 8.28±71.89           |
|                                       | <i>p</i> -value          |                     | 0.6325 <sup>4</sup>  |
| HDL cholesterol<br>(mg/dl), mean±SD   | V1                       | 53.50±10.82         | 54.98±10.44          |
|                                       | V5                       | 50.10±8.90          | 51.98±9.79           |
|                                       | V5-V1                    | -3.40±6.16          | -3.00±6.86           |
|                                       | <i>p</i> -value          | 0.0009 <sup>1</sup> | 0.0079 <sup>1</sup>  |
|                                       | Difference V5-V1 (Tx-Px) |                     | -0.40±6.52           |
|                                       | LS mean difference       |                     | -0.60                |
|                                       | <i>p</i> -value          |                     | 0.6300 <sup>4</sup>  |
| Leptin (mg/dl),<br>mean±SD            | V1                       | 21.03±14.23         | 28.22±15.77          |
|                                       | V5                       | 17.33±11.89         | 28.16±19.54          |
|                                       | V5-V1                    | -3.69±6.59          | -0.06±11.92          |
|                                       | <i>p</i> -value          | 0.0004 <sup>2</sup> | 0.5793 <sup>2</sup>  |
|                                       | Difference V5-V1 (Tx-Px) |                     | -3.63±9.60           |
|                                       | <i>p</i> -value          |                     | 0.1425 <sup>4</sup>  |
| Adiponectin<br>(mg/dl), mean±SD       | V1                       | 6933.11±3818.28     | 8448.21±4762.79      |
|                                       | V5                       | 6494.44±3091.42     | 8764.41±5787.27      |
|                                       | V5-V1                    | -438.67±2193.65     | 316.21±2706.40       |
|                                       | <i>p</i> -value          | 0.2496 <sup>2</sup> | 0.5113 <sup>2</sup>  |

|  |                          |                     |
|--|--------------------------|---------------------|
|  | Difference V5-V1 (Tx-Px) | -754.87±2460.25     |
|  | <i>p</i> -value          | 0.7882 <sup>4</sup> |

<sup>1</sup> *p*-value for the paired t-test

<sup>2</sup> *p*-value for the Wilcoxon signed rank test

<sup>3</sup> *p*-value for ANCOVA adjusted for baseline and sex

<sup>4</sup> *p*-value for the Wilcoxon rank sum test

**Table S7. Adverse effects (SAS)**

|     |                      | <b>BB-3 group (N=51)</b> | <b>Placebo group (N=49)</b> |
|-----|----------------------|--------------------------|-----------------------------|
|     |                      | <b>n (%) [F]</b>         | <b>n (%) [F]</b>            |
| AE  |                      | 15 (29.41) [21]          | 14 (28.57) [19]             |
|     | (95% CI†)            | (16.91, 41.92)           | (15.92, 41.22)              |
|     | p-value <sup>1</sup> | 0.9262                   |                             |
| ADR |                      | 0 (0.00) [0]             | 0 (0.00) [0]                |
|     | (95% CI†)            | (0.00, 0.00)             | (0.00, 0.00)                |
|     | p-value <sup>1</sup> | -                        |                             |
| SAE |                      | 0 (0.00) [0]             | 0 (0.00) [0]                |
|     | (95% CI†)            | (0.00, 0.00)             | (0.00, 0.00)                |
|     | p-value <sup>1</sup> | -                        |                             |

Note: [F]=frequency

<sup>1</sup> Compared between groups; p-value for the Chi-square test (C) or Fisher's exact test (F)

**Table S8. Changes in physical activity and dietary habits (PPS)**

|                                     |                 | BB-3 group (N=42)   | Placebo group (N=41) |
|-------------------------------------|-----------------|---------------------|----------------------|
| IPAQ                                | V2              | 2401.50±1955.78     | 2848.59±3562.14      |
| Total                               | V5              | 4151.02±5655.05     | 2808.20±3294.04      |
| Physical activity<br>(MET-min/week) | V5-V2           | 1749.52±4582.37     | -40.39±2645.99       |
|                                     | <i>p</i> -value | 0.3412 <sup>2</sup> |                      |
| IPAQ                                | V2              | 3065.91±2694.03     | 3653.76±4955.91      |
| Total                               | V5              | 5257.72±7531.41     | 3509.73±4546.55      |
| Energy expenditure<br>(Kcal/week)   | V5-V2           | 2191.81±5915.85     | -144.02±3317.14      |
|                                     | <i>p</i> -value | 0.3458 <sup>2</sup> |                      |
| Dietary survey                      | V2              | 1883.56±573.85      | 1827.53±657.96       |
| (Kcal)                              | V5              | 1811.72±440.19      | 1721.49±545.25       |
|                                     | V5-V2           | -71.84±579.75       | -106.03±704.08       |
|                                     | <i>p</i> -value | 0.8734 <sup>2</sup> |                      |

<sup>1</sup> *p*-value for the two-sample *t*-test, <sup>2</sup> *p*-value for the Wilcoxon rank sum test

The International Physical Activity Questionnaires (IPAQ) was used to assess physical activity, while the 24-hour dietary recall method was used to assess dietary habits.

**Table S9. Blood test results (SAS)**

|                                             |         | BB-3 (N=51)         | Placebo (N=49)      |
|---------------------------------------------|---------|---------------------|---------------------|
| WBC (10 <sup>3</sup> /μl),<br>mean±SD       | V1      | 6.12±1.35           | 6.21±2.11           |
|                                             | V5      | 5.93±1.09           | 6.10±1.71           |
|                                             | V5-V1   | -0.09±0.85          | -0.16±1.45          |
|                                             | p-value | 0.4665 <sup>1</sup> | 0.9662 <sup>2</sup> |
|                                             | p-value | 0.5423 <sup>4</sup> |                     |
| RBC (10 <sup>3</sup> /μl),<br>mean±SD       | V1      | 4.64±0.44           | 4.66±0.42           |
|                                             | V5      | 4.91±0.45           | 4.80±0.44           |
|                                             | V5-V1   | 0.22±0.28           | 0.13±0.31           |
|                                             | p-value | 0.0000 <sup>2</sup> | 0.0008 <sup>2</sup> |
|                                             | p-value | 0.3370 <sup>4</sup> |                     |
| Hemoglobin<br>(g/dl), mean±SD               | V1      | 13.94±1.53          | 14.06±1.45          |
|                                             | V5      | 14.67±1.43          | 14.49±1.24          |
|                                             | V5-V1   | 0.56±0.78           | 0.36±0.75           |
|                                             | p-value | 0.0000 <sup>2</sup> | 0.0006 <sup>2</sup> |
|                                             | p-value | 0.7163 <sup>4</sup> |                     |
| Hematocrit (%),<br>mean±SD                  | V1      | 41.25±4.01          | 41.62±3.93          |
|                                             | V5      | 43.25±3.85          | 42.85±3.44          |
|                                             | V5-V1   | 1.57±2.27           | 1.00±2.63           |
|                                             | p-value | 0.0000 <sup>2</sup> | 0.0024 <sup>2</sup> |
|                                             | p-value | 0.6642 <sup>4</sup> |                     |
| Platelets (10 <sup>3</sup> /μl),<br>mean±SD | V1      | 251.80±58.64        | 268.04±65.58        |
|                                             | V5      | 268.07±65.62        | 273.79±58.18        |
|                                             | V5-V1   | 18.80±36.03         | 8.53±40.91          |
|                                             | p-value | 0.0000 <sup>2</sup> | 0.0165 <sup>2</sup> |
|                                             | p-value | 0.5477 <sup>4</sup> |                     |
| Glucose (mg/dl),<br>mean±SD                 | V1      | 93.22±9.52          | 96.12±12.90         |
|                                             | V5      | 92.47±9.31          | 90.79±14.29         |
|                                             | V5-V1   | -1.53±10.48         | -5.95±11.03         |
|                                             | p-value | 0.3316 <sup>1</sup> | 0.0010 <sup>1</sup> |
|                                             | p-value | 0.0572 <sup>3</sup> |                     |
| BUN (mg/dl),<br>mean±SD                     | V1      | 14.09±3.28          | 14.11±3.75          |
|                                             | V5      | 13.59±3.50          | 13.17±3.54          |
|                                             | V5-V1   | -0.48±3.36          | -0.90±3.48          |
|                                             | p-value | 0.3479 <sup>1</sup> | 0.0963 <sup>1</sup> |
|                                             | p-value | 0.5599 <sup>3</sup> |                     |
| Creatinine<br>(mg/dl),                      | V1      | 0.82±0.13           | 0.85±0.15           |
|                                             | V5      | 0.81±0.15           | 0.81±0.18           |

|                                        |                 |                     |                     |
|----------------------------------------|-----------------|---------------------|---------------------|
| mean±SD                                | V5-V1           | -0.02±0.10          | -0.03±0.11          |
|                                        | <i>p</i> -value | 0.1702 <sup>1</sup> | 0.0363 <sup>1</sup> |
|                                        | <i>p</i> -value | 0.5349 <sup>1</sup> |                     |
| Total protein<br>(g/dl), mean±SD       | V1              | 7.40±0.35           | 7.42±0.32           |
|                                        | V5              | 7.27±0.38           | 7.21±0.33           |
|                                        | V5-V1           | -0.14±0.39          | -0.21±0.37          |
|                                        | <i>p</i> -value | 0.0057 <sup>2</sup> | 0.0006 <sup>1</sup> |
|                                        | <i>p</i> -value | 0.4515 <sup>4</sup> |                     |
| Albumin (g/dl),<br>mean±SD             | V1              | 4.26±10.27          | 4.29±0.24           |
|                                        | V5              | 4.20±0.06           | 4.28±0.25           |
|                                        | V5-V1           | -0.07±0.31          | -0.03±0.23          |
|                                        | <i>p</i> -value | 0.0990 <sup>2</sup> | 0.3357 <sup>1</sup> |
|                                        | <i>p</i> -value | 0.5856 <sup>4</sup> |                     |
| Total bilirubin<br>(mg/dl),<br>mean±SD | V1              | 0.81±0.37           | 0.79±0.31           |
|                                        | V5              | 0.88±0.44           | 0.73±0.28           |
|                                        | V5-V1           | 0.03±0.26           | -0.08±0.32          |
|                                        | <i>p</i> -value | 0.4243 <sup>1</sup> | 0.1043 <sup>1</sup> |
|                                        | <i>p</i> -value | 0.0740 <sup>3</sup> |                     |
| AST (UL),<br>mean±SD                   | V1              | 23.69±6.30          | 25.35±10.34         |
|                                        | V5              | 24.33±6.62          | 29.02±36.29         |
|                                        | V5-V1           | 0.84±6.18           | 4.74±36.42          |
|                                        | <i>p</i> -value | 0.3640 <sup>1</sup> | 0.6786 <sup>2</sup> |
|                                        | <i>p</i> -value | 0.6725 <sup>4</sup> |                     |
| ALT (U/L),<br>mean±SD                  | V1              | 21.73±9.69          | 25.80±18.74         |
|                                        | V5              | 25.76±13.83         | 25.74±16.31         |
|                                        | V5-V1           | 3.89±10.35          | 1.26±13.27          |
|                                        | <i>p</i> -value | 0.0239 <sup>2</sup> | 0.4360 <sup>2</sup> |
|                                        | <i>p</i> -value | 0.3215 <sup>4</sup> |                     |
| γ-GT (U/L),<br>mean±SD                 | V1              | 31.00±27.77         | 28.47±22.58         |
|                                        | V5              | 31.64±30.64         | 27.42±19.90         |
|                                        | V5-V1           | -0.78±12.26         | -0.23±5.96          |
|                                        | <i>p</i> -value | 0.3109 <sup>2</sup> | 0.6757 <sup>2</sup> |
|                                        | <i>p</i> -value | 0.6363 <sup>4</sup> |                     |

<sup>1</sup> *p*-value for the paired t-test

<sup>2</sup> *p*-value for the Wilcoxon signed rank test

<sup>3</sup> *p*-value for the two-sample t-test

<sup>4</sup> *p*-value for the Wilcoxon rank sum test

**Table S10. Urine test results (SAS)**

|                         |                      | Week 12/baseline (Week 1) | Normal, n (%)       | Abnormal, n (%) |
|-------------------------|----------------------|---------------------------|---------------------|-----------------|
| <b>Specific gravity</b> | BB-3 group (N=51)    | Normal, n (%)             | 34 (66.67)          | 5(9.80)         |
|                         |                      | Abnormal, n (%)           | 4 (7.84)            | 2(3.92)         |
|                         |                      | <i>p</i> -value           | 0.7389 <sup>1</sup> |                 |
|                         | Placebo group (N=49) | Normal, n (%)             | 35 (71.43)          | 4(8.16)         |
|                         |                      | Abnormal, n (%)           | 2 (3.92)            | 2(3.92)         |
|                         |                      | <i>p</i> -value           | 0.4142 <sup>1</sup> |                 |
| <b>pH</b>               | BB-3 group (N=51)    | Normal, n (%)             | 45 (88.24)          | 0 (0.00)        |
|                         |                      | Abnormal, n (%)           | 0 (0.00)            | 0 (0.00)        |
|                         |                      | <i>p</i> -value           | -                   |                 |
|                         | Placebo group (N=49) | Normal, n (%)             | 43 (87.76)          | 0 (0.00)        |
|                         |                      | Abnormal, n (%)           | 0(0.00)             | 0 (0.00)        |
|                         |                      | <i>p</i> -value           | -                   |                 |
| <b>Protein</b>          | BB-3 group (N=51)    | Normal, n (%)             | 30 (58.82)          | 7 (13.73)       |
|                         |                      | Abnormal, n (%)           | 7 (13.73)           | 1 (1.96)        |
|                         |                      | <i>p</i> -value           | 1.0000 <sup>1</sup> |                 |
|                         | Placebo group (N=49) | Normal, n (%)             | 32 (65.31)          | 7 (14.29)       |
|                         |                      | Abnormal, n (%)           | 2 (3.92)            | 2 (3.92)        |
|                         |                      | <i>p</i> -value           | 0.0956 <sup>1</sup> |                 |
| <b>Glucose</b>          | BB-3 group (N=51)    | Normal, n (%)             | 45 (88.24)          | 0 (0.00)        |
|                         |                      | Abnormal, n (%)           | 0 (0.00)            | 0 (0.00)        |
|                         |                      | <i>p</i> -value           | -                   |                 |
|                         | Placebo group (N=49) | Normal, n (%)             | 42 (85.71)          | 1 (2.04)        |
|                         |                      | Abnormal, n (%)           | 0 (0.00)            | 0 (0.00)        |
|                         |                      | <i>p</i> -value           | -                   |                 |

|                    |                         |                 |            |                     |
|--------------------|-------------------------|-----------------|------------|---------------------|
| <b>Blood (RBC)</b> | BB-3 group (N=51)       | Normal, n (%)   | 27 (52.94) | 8 (15.69)           |
|                    |                         | Abnormal, n (%) | 3 (5.88)   | 7 (13.73)           |
|                    |                         | <i>p</i> -value |            | 0.1317 <sup>1</sup> |
|                    | Placebo group<br>(N=49) | Normal, n (%)   | 24 (48.98) | 7 (14.29)           |
|                    |                         | Abnormal, n (%) | 3 (5.88)   | 9 (17.65)           |
|                    |                         | <i>p</i> -value |            | 0.2059 <sup>1</sup> |

<sup>1</sup>*p*-value for McNemar's test



**Table S11.** Abbreviations and glossary of terms

|              |                                                      |
|--------------|------------------------------------------------------|
| ADR          | Adverse drug reaction                                |
| AE           | Adverse event                                        |
| ALP          | Alkaline phosphatase                                 |
| ALT          | Alanine aminotransferase                             |
| ANCOVA       | Analysis of covariance                               |
| AST          | Aspartate aminotransferase                           |
| BB-3         | <i>Bifidobacterium breve</i> B-3                     |
| BUN          | Blood urea nitrogen                                  |
| CFU          | Colony-forming units                                 |
| CIM          | carbohydrate-insulin model                           |
| COVID-19     | Coronavirus disease 2019                             |
| CRP          | C-reactive protein                                   |
| CT           | Computed tomography                                  |
| DALY         | the global deaths and disability-adjusted life years |
| DEXA         | Dual energy x-ray absorptiometry                     |
| EBM          | energy balance model                                 |
| ESR          | Erythrocyte sedimentation rate                       |
| FAS          | Full analysis set                                    |
| GBD          | Global Burden of Disease Study                       |
| $\gamma$ -GT | Gamma-glutamyltransferase                            |
| HCG          | Human chorionic gonadotropin                         |
| HDL-C        | High density lipoprotein-cholesterol                 |
| IPAQ         | International Physical Activity Questionnaires       |
| IRB          | Institutional review board                           |
| IWRS         | Interactive web response system                      |
| LDL-C        | Low-density lipoprotein-cholesterol                  |
| MET          | Metabolic equivalent of task                         |
| PPS          | Per protocol set                                     |
| RBC          | Red blood cell                                       |
| SAE          | Serious adverse event                                |
| SAS          | Safety analysis set                                  |
| TG           | Triglyceride                                         |
| VSR          | Visceral fat area/subcutaneous fat area ratio        |
| UNL          | Upper normal limit                                   |
| WBC          | White blood cell                                     |
